# Supplementary material for: Enhanced stability and optical performance of CsPbBr3@FAPbBr3 core–shell perovskite nanocrystals
Source: Royal Society of Chemistry journal article supplement (doi:10.1039/d4nr05049e), 2025-01-01
Supplement: d4nr05049e1.pdf [file d4nr05049e1.pdf]

## Supplementary Information for

### Enhanced Stability and Optical Performance of CsPbBr<sub>3</sub>@FAPbBr<sub>3</sub> Core-Shell Perovskite Nanocrystals

Danila A. Tatarinov, Azat O. Ismagilov, Aleksandra V. Koroleva, Evgeniy V. Zhizhin, Weitao Zheng, Aleksander V. Baranov, and Aleksandr P. Litvin\*

E-mail: litvin@jlu.edu.cn

### Perovskite NC Molar Concentration and Multiphoton Absorption Cross-Section Calculations

These calculations were adapted from a previous reported procedure.<sup>1</sup> The perovskite NC extinction coefficient ( $\epsilon$ ) at 400 nm was calculated from the following equation:

$$O_{\mu} = \frac{D}{C_M l} = \frac{m_{NC} D}{C_{mass} l} = \frac{N_A B \epsilon^{TM} V_{NC} B \epsilon^{TM} \Pi \Gamma D}{C_{mass} l}, \quad (S1)$$

where  $D$  is the absorbance of the sample at 400 nm;  $C_M$  is NC molar concentration;  $l$  is cuvette length;  $m_{NC}$  is molar mass of the single NC;  $C_{mass}$  is mass concentration;  $N_A$  is the Avogadro number;  $V_{NC}$  is NC volume (determined from the NC size);  $\rho$  is the NC density. NC density was calculated by normalizing the crystalline cell mass to the cell volume:

$$\Pi \Gamma = \frac{m_{cell}}{V_{cell}} = \frac{m_{cell}}{r^3}, \quad (S2)$$

where  $m_{cell}$  and  $V_{cell}$  are the respective cell mass and cell volume,  $r$  is the edge length, determined from TEM (see Figure 1c,d). Cell mass was calculated from known NC stoichiometry. Mass concentration of the solution was determined from the weight of thoroughly washed and dried NCs.

Concentrations of NCs and Rhodamine 6G were determined from Beer's law. For Rhodamine 6G, the known extinction coefficient ( $\sim 40,000 \text{ mol}^{-1} \text{ cm}^{-1}$ ) at 500 nm was used.<sup>2,3</sup>

Rhodamine 6G in ethanol was used as a standard for calculating the 2PA cross section. The cross section of Rhodamine 6G was taken to be  $128 \pm 84 \text{ GM}$  ( $10^{-50} \cdot \text{cm}^4 \cdot \text{s} \cdot \text{photon}^{-1}$ ), as averaged from the literature data (obtained at 800 nm with a pulse duration of 100 fs).<sup>4-6</sup> To estimate the 2PA cross section, the PL was first measured under single-photon excitation. The PL was measured relative to the standard rhodamine 6G in ethanol (PL  $\sim 0.9$ ). The PL quantum yield was calculated using equation S3:

$$\Pi \dagger_s = \Pi \dagger_r \frac{I_s D_r (n_r)^2}{I_r D_s (n_s)^2}, \quad (\text{S3})$$

where  $\varphi$  is the PL quantum yield under one-photon excitation;  $I$  is the area of the PL spectra,  $D$  is the optical density at the excitation wavelength,  $n$  is the refractive index of the solution; the indices  $r$  and  $s$  represent the values for the referent standard and sample, respectively.

Then the 2PA cross section was calculated using equation S4:

$$\Pi \dagger_s^{2PA} \sigma_s = \Pi \dagger_r^{2PA} \sigma_r \frac{\Pi \dagger_r I_s^{2P} C_r n_r}{\Pi \dagger_s I_r^{2P} C_s n_s}, \quad (\text{S4})$$

where  $\sigma^{2PA}$  is the 2PA cross section (in GM);  $\varphi$  is the one-photon excited PL;  $\eta$  is the two-photon excited PL;  $I^{2P}$  is the area of the two-photon excited PL spectra,  $C$  is the concentration (in M),  $n$  is the refractive index of the solution; the indices  $r$  and  $s$  represent the values for the referent standard and sample, respectively. Provided that  $\varphi = \eta$  the equation can be rewritten as follows:

$$\Pi \dagger_s^{2PA} = \Pi \dagger_r^{2PA} \frac{\Pi \dagger_r I_s^{2P} C_r n_r}{\Pi \dagger_s I_r^{2P} C_s n_s}, \quad (\text{S5})$$

## Supplementary Figures

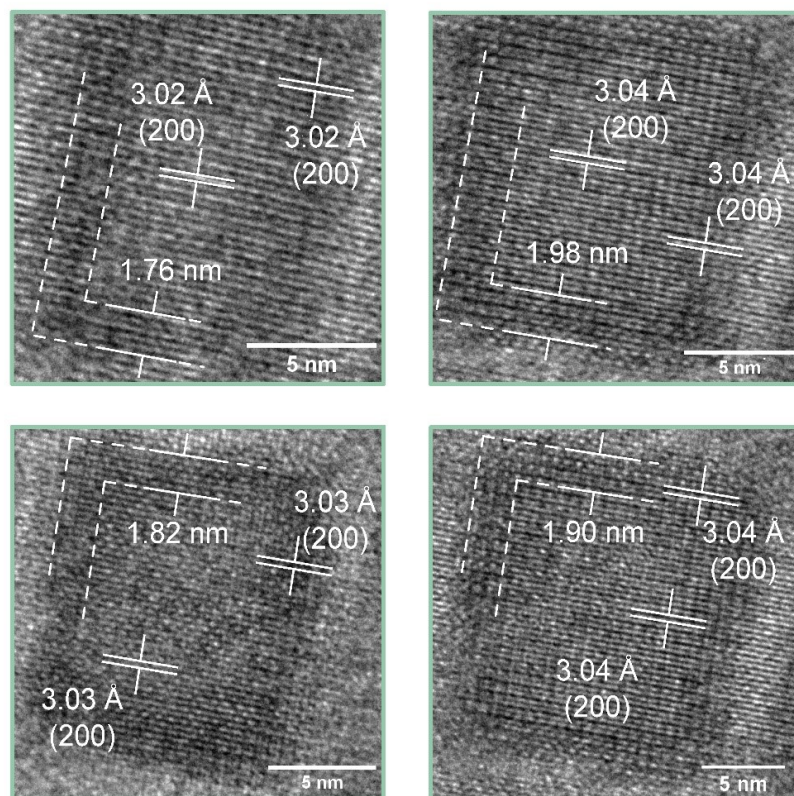

**Figure S1.** HR-TEM images TEM images of CsPbBr<sub>3</sub>@FAPbBr<sub>3</sub> with estimated interplanar distances and FAPbBr<sub>3</sub> shell thickness.

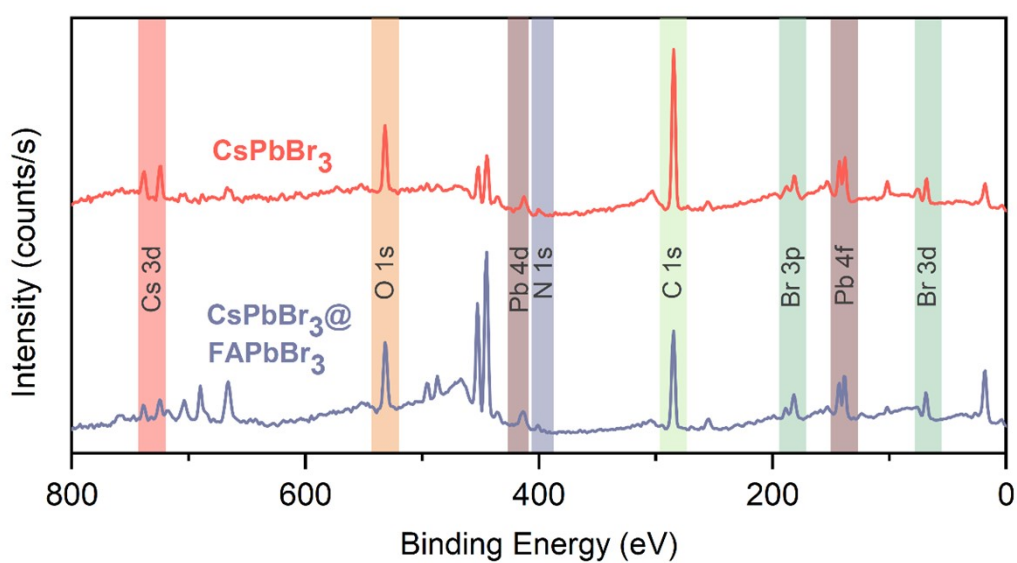

**Figure S2.** Survey XPS spectra for the CsPbBr<sub>3</sub> core (red) and CsPbBr<sub>3</sub>@FAPbBr<sub>3</sub> core-shell (blue) NCs.

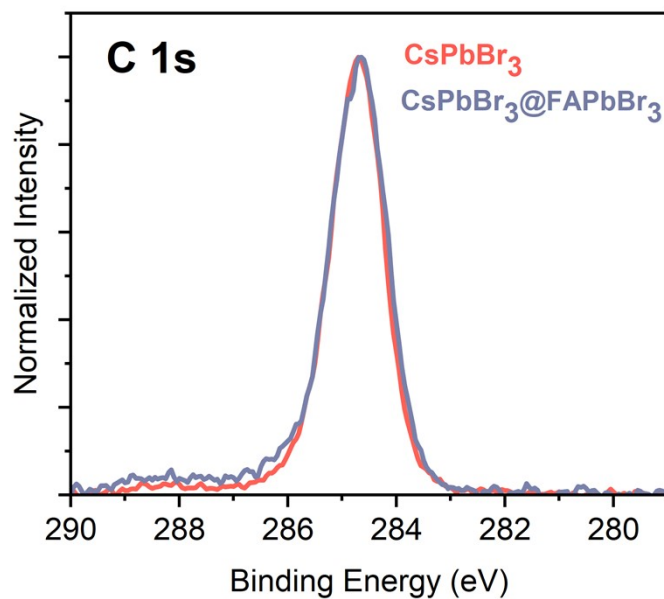

**Figure S3.** XPS C 1s spectra of CsPbBr<sub>3</sub> core (red) and CsPbBr<sub>3</sub>@FAPbBr<sub>3</sub> core-shell (blue) NCs after the peak calibration.

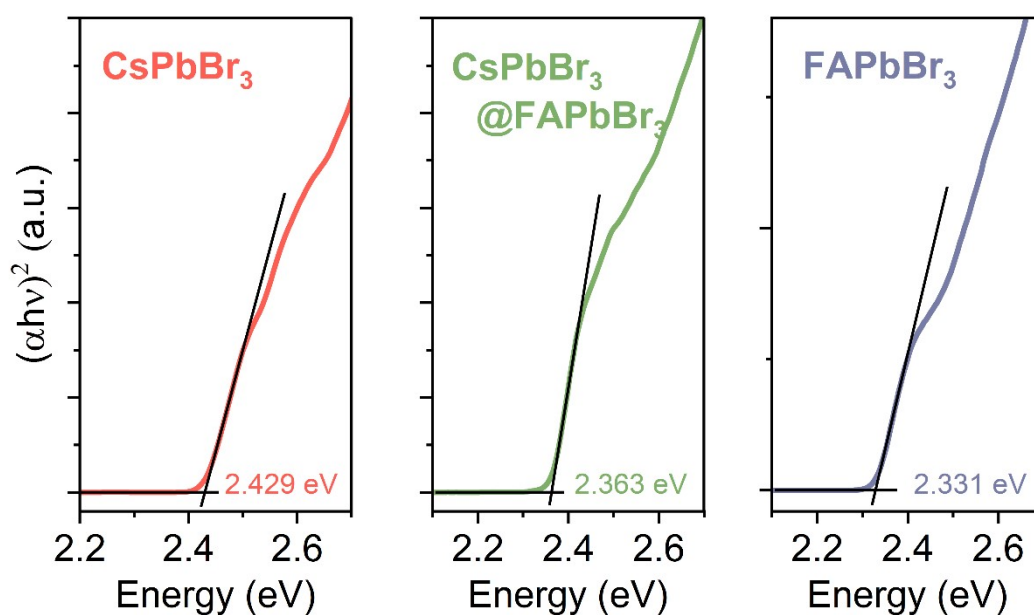

**Figure S4.** Tauc plots for the CsPbBr<sub>3</sub> core (red), CsPbBr<sub>3</sub>@FAPbBr<sub>3</sub> core-shell (green), FAPbBr<sub>3</sub> (blue) NCs. The bandgaps were determined by finding the point where the linear fit of the slope intersects with the zero line.

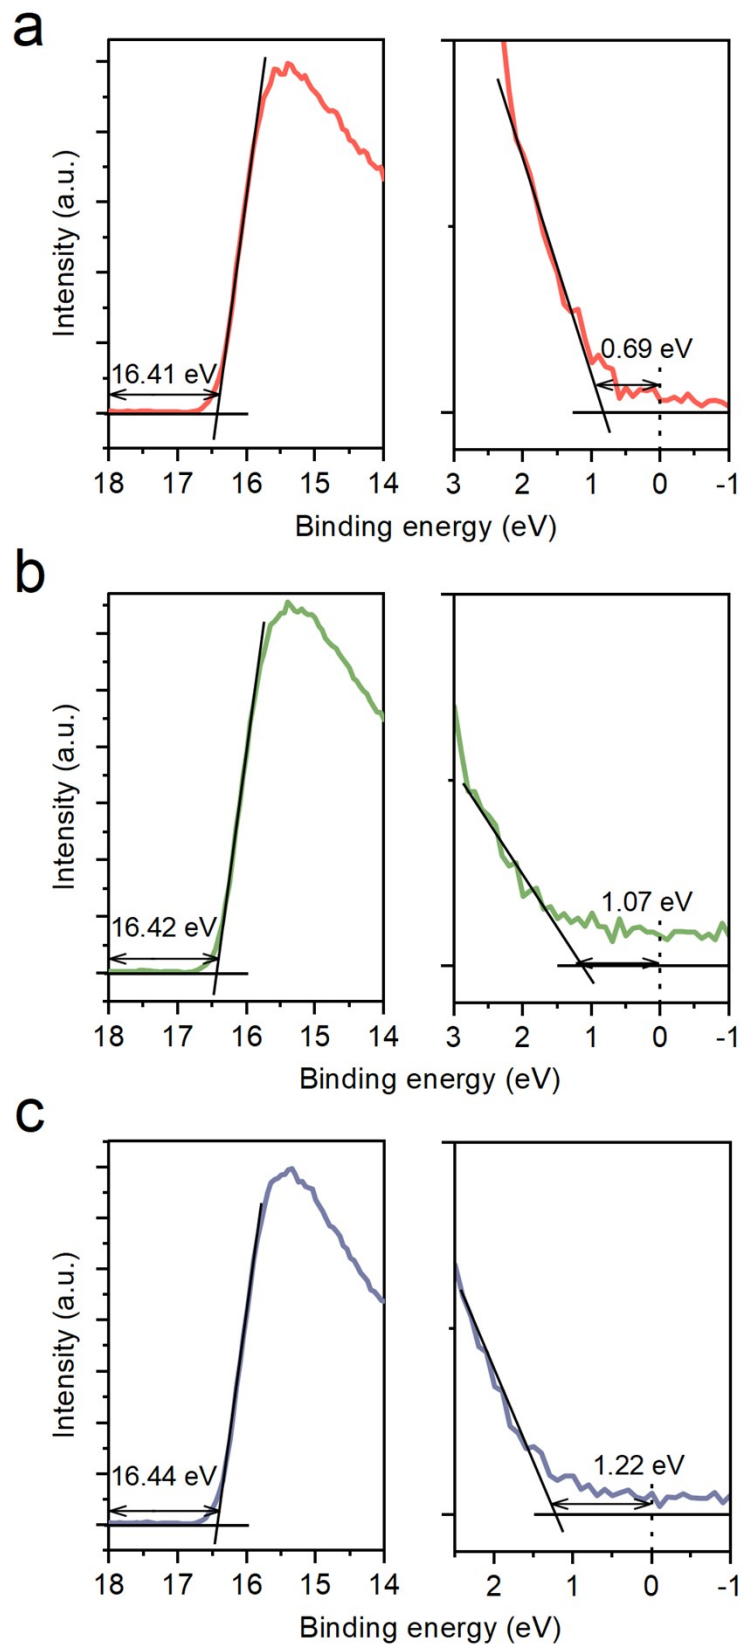

**Figure S5.** UPS spectra for the cutoff (left) and valence (right) regions for (a) CsPbBr<sub>3</sub> core, (b) CsPbBr<sub>3</sub>@FAPbBr<sub>3</sub> core-shell, (c) FAPbBr<sub>3</sub> NCs.

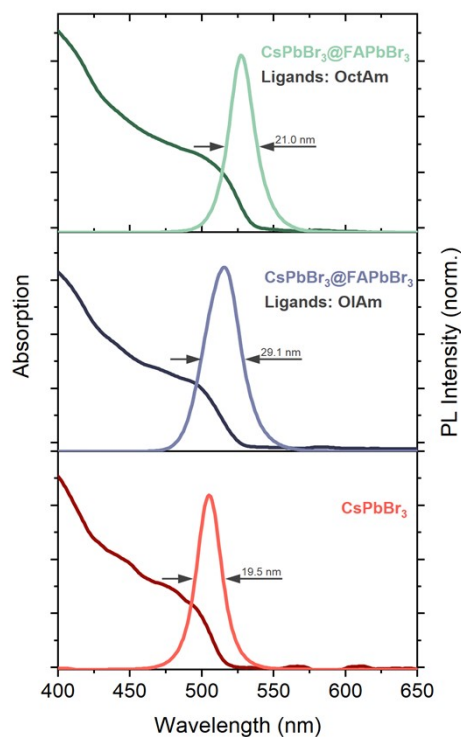

**Figure S6.** Absorption and PL spectra of CsPbBr<sub>3</sub> core (red) and CsPbBr<sub>3</sub>@FAPbBr<sub>3</sub> core-shell NCs synthesized with oleylamine (blue) and octylamine (green).

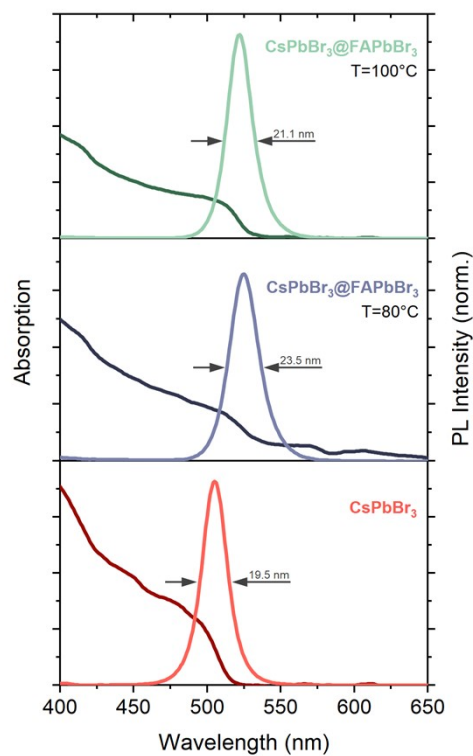

**Figure S7.** Absorption and PL spectra of CsPbBr<sub>3</sub> core (red) and CsPbBr<sub>3</sub>@FAPbBr<sub>3</sub> core-shell NCs synthesized with oleylamine (blue) and octylamine (green).

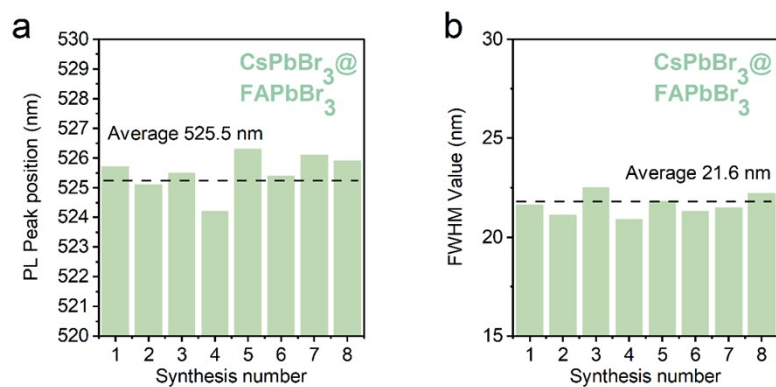

**Figure S8.** Reproducibility of (a) PL Peak position and (b) PL FWHM of CsPbBr<sub>3</sub>@FAPbBr<sub>3</sub> core-shell NCs synthesized with octylamine.

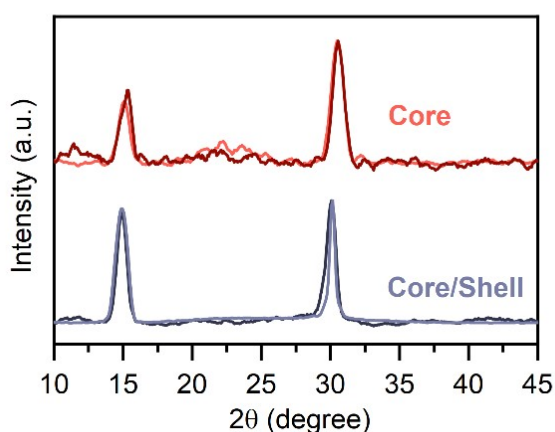

**Figure S9.** Comparison of XRD patterns obtained for the CsPbBr<sub>3</sub> (red) and CsPbBr<sub>3</sub>@FAPbBr<sub>3</sub> (blue) NCs after being stored for 2 months.

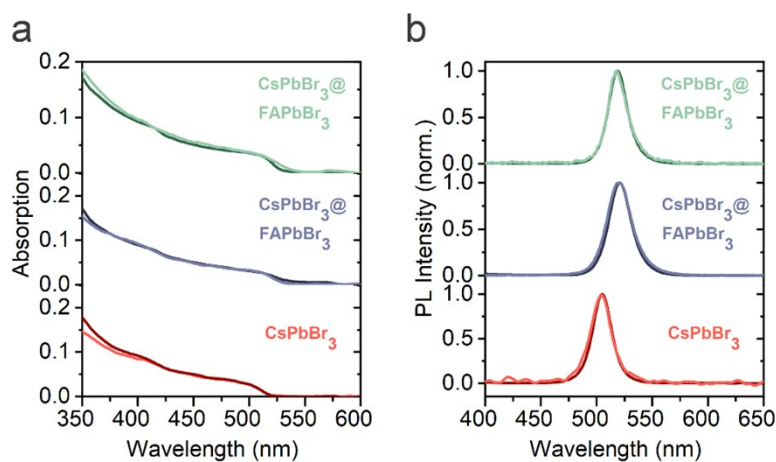

**Figure S10.** Comparison of absorption (a) and PL (b) spectra of CsPbBr<sub>3</sub> core (red) and CsPbBr<sub>3</sub>@FAPbBr<sub>3</sub> core-shell NCs synthesized at 80°C (blue) and 100°C (green) after being stored for 2 months.



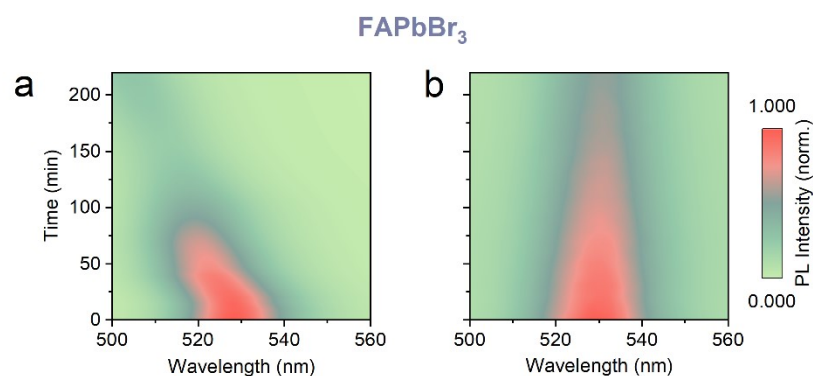

**Figure S11.** The photo- (a) and thermostability (b) of the PL spectra for FAPbBr<sub>3</sub> NCs.

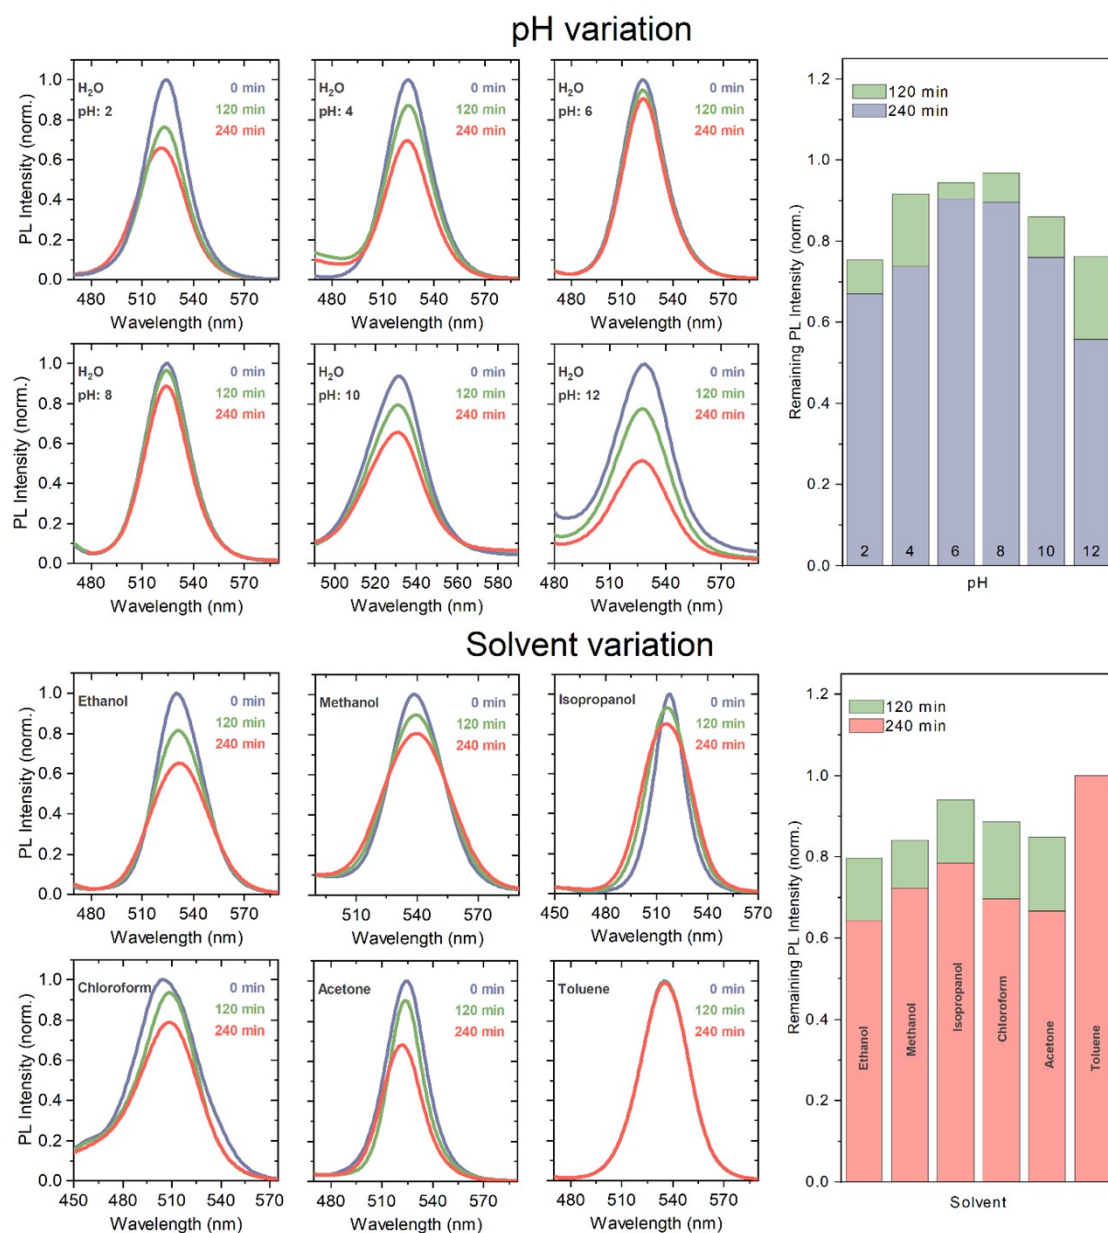

**Figure S12.** Comparison of the stability for the SiO<sub>2</sub>-coated CsPbBr<sub>3</sub>@FAPbBr<sub>3</sub> core-shell NCs at various pH values (upper panel) and in various solvents (bottom panel). The bar graphs represent the remaining PL intensity after 120 and 240 min in the corresponding solvents.



## Supplementary Tables

**Table S1.** The results of the fitting of PL decay curves recorded for CsPbBr<sub>3</sub> core and CsPbBr<sub>3</sub>@FAPbBr<sub>3</sub> core-shell NCs.

| Sample                                   | Intensity-averaged PL lifetime, ns | A <sub>1</sub> (kCnts) | τ <sub>1</sub> , ns | A <sub>2</sub> (kCnts) | τ <sub>2</sub> , ns | A <sub>3</sub> (kCnts) | τ <sub>3</sub> , ns |
|------------------------------------------|------------------------------------|------------------------|---------------------|------------------------|---------------------|------------------------|---------------------|
| CsPbBr <sub>3</sub>                      | 13.1 ± 0.5                         | 0.824 ± 0.004          | 1.68 ± 0.06         | 0.013 ± 0.002          | 49.00 ± 3.71        | 0.164 ± 0.002          | 6.51 ± 0.23         |
| CsPbBr <sub>3</sub> @FAPbBr <sub>3</sub> | 20.5 ± 0.3                         | 0.819 ± 0.008          | 9.00 ± 0.19         | 0.181 ± 0.008          | 35.00 ± 0.67        | 0                      | 0                   |
| FAPbBr <sub>3</sub>                      | 17.4 ± 0.3                         | 0.434 ± 0.005          | 12.00 ± 0.24        | 0.013 ± 0.001          | 71.00 ± 4.31        | 0.552 ± 0.009          | 3.6 ± 0.13          |

**Table S2.** Reported values of 2PA cross-section ( $\sigma^{2PA}$ ) for CsPbBr<sub>3</sub> nanocrystals (NCs), nanoplatelets (NPs), nanorods (NRs), and nanowires (NWs).

| Sample                   | Size (nm)    | $\sigma^{2PA}$ (GM)       | Volume Normalized $\sigma^{2PA}$ (GM×nm <sup>-3</sup> ) | Technique (pulse duration, repetition rate, ex. wavelength) | Ref. |
|--------------------------|--------------|---------------------------|---------------------------------------------------------|-------------------------------------------------------------|------|
| CsPbBr <sub>3</sub> NCs  | 20           | 3.68×10 <sup>4</sup>      | 4.6                                                     | 2PPL (100 fs, 1 kHz, 800 nm)                                | 7    |
| CsPbBr <sub>3</sub> NCs  | 25           | 8.5×10 <sup>4</sup>       | 5.44                                                    | Z-scan (100 fs, 80 MHz, 800 nm)                             | 8    |
| CsPbBr <sub>3</sub> NCs  | 7.3          | 1.2×10 <sup>5</sup>       | 308                                                     | Z-scan (100 fs, 1 kHz, 720-1200 nm)                         | 9    |
| CsPbBr <sub>3</sub> NCs  | 20           | 1.4×10 <sup>5</sup>       | 17.5                                                    | Z-scan (— fs, 1 kHz, 790-925 nm)                            | 10   |
| CsPbBr <sub>3</sub> QDs  | 7            | 1.8×10 <sup>5</sup>       | 525                                                     | Z-scan (100 fs, 1 kHz, 700-1500 nm)                         | 11   |
| CsPbBr <sub>3</sub> NRs  | 200×10       | 2.1×10 <sup>5</sup>       | 105                                                     | Z-scan (100 fs, 80 MHz, 800 nm)                             | 8    |
| CsPbBr <sub>3</sub> QDs  | 12.4         | 2.2×10 <sup>5</sup>       | 115                                                     | Z-scan (— fs, 1 kHz, 800 nm)                                | 12   |
| CsPbBr <sub>3</sub> NPLs | 10.4×7.8×1.8 | 2.28×10 <sup>5</sup>      | 1562                                                    | Z-scan (100 fs, 1 kHz, 720-1200 nm)                         | 9    |
| CsPbBr <sub>3</sub> NCs  | 12.4         | (3.2±1.9)×10 <sup>5</sup> | 171±112                                                 | 2PPL (30 fs, 800-1300 nm)                                   | 1    |

|                                                     |           |                         |          |                                     |           |
|-----------------------------------------------------|-----------|-------------------------|----------|-------------------------------------|-----------|
| CsPbBr <sub>3</sub><br>NPLs                         | 20×4×20   | 4.9×10 <sup>5</sup>     | 306      | Z-scan (100 fs, 80 MHz, 800 nm)     | 8         |
| CsPbBr <sub>3</sub><br>NCs                          | 12        | 9.8×10 <sup>5</sup>     | 567      | Z-scan (70 fs, 1 kHz, 800 nm)       | 13        |
| CsPbBr <sub>3</sub><br>NCs                          | 9         | 1.0±0.2×10 <sup>6</sup> | 1372±274 | Z-scan (50 fs, 1 kHz, 675-1000 nm)  | 14        |
| CsPbBr <sub>3</sub><br>NRs                          | 61.3*11.6 | 1.5×10 <sup>6</sup>     | 221      | Z-scan (100 fs, 1 kHz, 800-1300 nm) | 15        |
| CsPbBr <sub>3</sub><br>NCs                          | 9         | 2.7×10 <sup>6</sup>     | 3704     | Z-scan (90 fs, 1 k Hz, 800 nm)      | 16        |
| CsPbBr <sub>3</sub><br>NCs                          | 8.3       | 2.7×10 <sup>5</sup>     | 472      | 2PPL (30 fs, 800-1300 nm)           | This work |
| CsPbBr <sub>3</sub> @<br>FAPbBr <sub>3</sub><br>NCs | 11.2      | 1.3×10 <sup>6</sup>     | 996      | 2PPL (30 fs, 800-1300 nm)           | This work |

**Table S3.** Comparison of stability in water for perovskite-based composite materials, according to literature data.

| Materials                                                              | Synthesis method                                           | PL peak position | PL QY (non-polar solvent) | Size                             | PL stability                                           | Application | Year | Ref. |
|------------------------------------------------------------------------|------------------------------------------------------------|------------------|---------------------------|----------------------------------|--------------------------------------------------------|-------------|------|------|
| CsPbI <sub>3</sub> @ 3IS<br>@SiO <sub>2</sub><br>phospholipid micelles | Two-step passivation with 3IS                              | 680 nm           | 91%                       | 16 nm                            | 45% after 6h (H <sub>2</sub> O)                        | Bio-Imaging | 2022 | 17   |
| CsPbBr <sub>3</sub> -SiO <sub>2</sub> composites                       | Two-step hydrolysis of PH-TMOS                             | 521 nm           | 65%                       | 13 nm                            | 62% PL retention after 30 min (hexane/ethanol mixture) | N/A         | 2021 | 18   |
| CsPbBr <sub>3</sub> /mSiO <sub>2</sub> composites                      | LARP                                                       | 510 nm           | 90%                       | 10 nm                            | 50% after 35 days (H <sub>2</sub> O)                   | LEDs        | 2020 | 19   |
| CsPbBr <sub>3</sub> /mSiO <sub>2</sub> nanocomposites                  | <i>in situ</i> template-assisted synthesis                 | 514 nm           | 63%                       | 150 nm                           | 100% after 50 days (H <sub>2</sub> O)                  | Biosensing  | 2024 | 20   |
| CsPbBr <sub>3</sub> -SiO <sub>2</sub> composites                       | One-step <i>in situ</i> synthesis and encapsulation method | 520 nm           | 84.7%                     | Thin films with 34.7 nm crystals | >60% for 1100 h (H <sub>2</sub> O)                     | N/A         | 2023 | 21   |

|                                                                      |                                                                                            |           |             |                                         |                                          |                  |      |    |
|----------------------------------------------------------------------|--------------------------------------------------------------------------------------------|-----------|-------------|-----------------------------------------|------------------------------------------|------------------|------|----|
| CsPbBr <sub>3</sub> /<br>SiO <sub>2</sub><br>nanocrystals            | RT<br>synthesis and<br>SiO <sub>2</sub><br>encapsulation                                   | 520<br>nm | N/A         | 140 nm                                  | 98.3% after<br>168 h (H <sub>2</sub> O)  | PL<br>sensing    | 2022 | 22 |
| CsPbBr <sub>3</sub><br>QDs/MSs                                       | High<br>temperature<br>solid phase<br>melting<br>method                                    | 520<br>nm | N/A         | 500 nm                                  | 80%<br>for 2 weeks (H <sub>2</sub> O)    | WLEDs            | 2022 | 23 |
| CsPbBr <sub>3</sub> /<br>SiO <sub>2</sub><br>composites              | Molten salts<br>synthesis<br>approach                                                      | 520<br>nm | 89 ±<br>10% | 0.6 μm                                  | 95% after<br>30 days (H <sub>2</sub> O)  | WLEDs            | 2021 | 24 |
| DDAB-<br>CsPbBr <sub>3</sub> /<br>SiO <sub>2</sub> QDs<br>composites | Silica-coating<br>at room<br>temperature                                                   | 520<br>nm | 80%         | N/A                                     | 50% after 210 min<br>(H <sub>2</sub> O)  | WLEDs            | 2021 | 25 |
| CsPbBr <sub>3</sub> /<br>polymer<br>microspheres                     | Encapsulation<br>in<br>microspheres                                                        | 520<br>nm | N/A         | 285 nm                                  | 100% after 28<br>days (H <sub>2</sub> O) | Detectors        | 2021 | 26 |
| CsPbBr <sub>3</sub> -SiO <sub>2</sub><br>powders                     | Encapsulating<br>derived from<br>molecular<br>sieve<br>templates at<br>high<br>temperature | 520<br>nm | 63%         | Pore<br>size 3.6<br>nm<br>length<br>N/A | 100% after 50<br>days (H <sub>2</sub> O) | LEDs             | 2020 | 27 |
| CsPbBr <sub>3</sub> /mSiO <sub>2</sub><br>composites                 | Hot injection<br><i>in situ</i> growth<br>in m-SiO <sub>2</sub><br>matrix                  | 520<br>nm | 68%         | 400 nm                                  | 80% after<br>120 h (H <sub>2</sub> O)    | Flexible<br>LEDs | 2019 | 28 |

|                                                             |                                            |             |         |                                  |                                                             |                       |      |    |
|-------------------------------------------------------------|--------------------------------------------|-------------|---------|----------------------------------|-------------------------------------------------------------|-----------------------|------|----|
| CsPbBr <sub>3</sub> /mSiO <sub>2</sub> composites           | HI+ SiO <sub>2</sub> coating with MPTMS    | 525 nm      | 80%     | 150 nm                           | 80% after 13 h (H <sub>2</sub> O)                           | TPA-excited PL        | 2020 | 29 |
| CsPbX <sub>3</sub> @SiO <sub>2</sub> nanocomposites         | HI+ SiO <sub>2</sub> coating with TEOS     | 410-680 nm  | 9%-84%  | 100 nm                           | 60%-95% after 30 days (H <sub>2</sub> O)                    | LEDs and cell imaging | 2018 | 30 |
| APbX <sub>3</sub> /meso-SiO <sub>2</sub>                    | <i>in situ</i> template-assisted synthesis | 480-620 nm  | 48%-90% | Pore size 2.5-7 nm, length N/A   | N/A                                                         | N/A                   | 2016 | 31 |
| CsPbX <sub>3</sub> /meso-SiO <sub>2</sub> spheres           | NCs encapsulation                          | 450-640 nm  | ≤55%    | N/A                              | N/A                                                         | WLEDs                 | 2016 | 32 |
| FAPbI <sub>3</sub> @SiO <sub>2</sub> composites             | LARP+ TOPO                                 | 770 nm      | 72%     | 15 nm                            | 80% after 28 days (atmosphere)                              | LEDs                  | 2023 | 33 |
| CsPbI <sub>3</sub> @SiO <sub>2</sub> composites             | HI+ SiO <sub>2</sub> coating               | 660 - 680nm | 97.5%   | 10.07±0.93 nm                    | 79% PL retention after 40 min (ethanol)                     | NIR LEDs              | 2023 | 34 |
| CsPbI <sub>3</sub> @SiO <sub>2</sub> nanocomposites         | HI+ SiO <sub>2</sub> coating with APTES    | 697 nm      | N/A     | 13 nm                            | 95% after 48 h (H <sub>2</sub> O)                           | LEDs                  | 2019 | 35 |
| FAPbI <sub>3</sub> @TEOS                                    | LARP+ TEOS                                 | 770 nm      | 57.2%   | 15.17 nm                         | 80% PL retention after 7 days (Toluene/DI H <sub>2</sub> O) | NIR LEDs              | 2023 | 36 |
| MAPbBr <sub>x</sub> I <sub>3-x</sub> /meso-SiO <sub>2</sub> | <i>in situ</i> template-assisted synthesis | 500-800 nm  | ≤5.5%   | Pore size 3.3-7.1 nm, length N/A | N/A                                                         | Solid-state LEDs      | 2016 | 37 |

|                                                                        |                                               |                |     |            |                                                                               |                       |      |                      |
|------------------------------------------------------------------------|-----------------------------------------------|----------------|-----|------------|-------------------------------------------------------------------------------|-----------------------|------|----------------------|
| FAPbI <sub>3</sub> @<br>APTES                                          | LARP+<br>APTES                                | 770 -<br>810nm | 58% | 16.8<br>nm | 30% PL retention<br>after 380 min<br>(Toluene/DI H <sub>2</sub> O)            | NIR<br>LEDs           | 2021 | 38                   |
| CsPbBr <sub>3</sub> @<br>FAPbBr <sub>3</sub> @<br>SiO <sub>2</sub> NCs | HI+ SiO <sub>2</sub><br>coating with<br>MPTMS | 525<br>nm      | 93% | 11.2<br>nm | 90% after 240 min<br>(H <sub>2</sub> O)<br>81% after 240 min<br>(isopropanol) | TPA-<br>excited<br>PL | 2025 | <b>This<br/>work</b> |

## References

- 1 I. D. Skurlov, W. Yin, A. O. Ismagilov, A. N. Tcypkin, H. Hua, H. Wang, X. Zhang, A. P. Litvin and W. Zheng, *Nanomaterials*, 2022, **12**, 1–16.
- 2 P. C. Beaumont, D. G. Johnson and B. J. Parsons, *J. Chem. Soc. Faraday Trans.*, 1993, **89**, 4185.
- 3 D. N. Dempster, T. Morrow and M. F. Quinn, *J. Photochem.*, 1973, **2**, 343–359.
- 4 R. Kapoor, C. S. Friend and A. Patra, *J. Opt. Soc. Am. B*, 2003, **20**, 1550.
- 5 M. A. Albota, C. Xu and W. W. Webb, *Appl. Opt.*, 1998, **37**, 7352.
- 6 A. Fischer, C. Cremer and E. H. K. Stelzer, *Appl. Opt.*, 1995, **34**, 1989.
- 7 W. Chen, S. Zhang, M. Zhou, T. Zhao, X. Qin, X. Liu, M. Liu and P. Duan, *J. Phys. Chem. Lett.*, 2019, **10**, 3290–3295.
- 8 A. Pramanik, S. Patibandla, Y. Gao, K. Gates and P. C. Ray, *JACS Au*, 2021, **1**, 53–65.
- 9 T. He, J. Li, X. Qiu, S. Xiao, C. Yin and X. Lin, *Adv. Opt. Mater.*, 2018, **6**, 1800843.
- 10 J. Szeremeta, M. A. Antoniak, D. Wawrzyńczyk, M. Nyk and M. Samoć, *Nanomaterials*, 2020, **10**, 1054.
- 11 A. Pramanik, K. Gates, Y. Gao, S. Begum and P. Chandra Ray, *J. Phys. Chem. C*, 2019, **123**, 5150–5156.
- 12 Q. Han, W. Wu, W. Liu, Q. Yang and Y. Yang, *Opt. Mater. (Amst.)*, 2018, **75**, 880–886.
- 13 K. N. Krishnakanth, S. Seth, A. Samanta and S. V. Rao, *Opt. Lett.*, 2018, **43**, 603.
- 14 W. Chen, S. Bhaumik, S. A. Veldhuis, G. Xing, Q. Xu, M. Grätzel, S. Mhaisalkar, N.

- Mathews and T. C. Sum, *Nat. Commun.*, 2017, **8**, 15198.
- 15 J. Li, Q. Jing, S. Xiao, Y. Gao, Y. Wang, W. Zhang, X. W. Sun, K. Wang and T. He, *J. Phys. Chem. Lett.*, 2020, **11**, 4817–4825.
- 16 Y. Xu, Q. Chen, C. Zhang, R. Wang, H. Wu, X. Zhang, G. Xing, W. W. Yu, X. Wang, Y. Zhang and M. Xiao, *J. Am. Chem. Soc.*, 2016, **138**, 3761–3768.
- 17 W. Song, D. Wang, J. Tian, G. Qi, M. Wu, S. Liu, T. Wang, B. Wang, Y. Yao, Z. Zou and B. Liu, *Small*, 2022, **18**, 2204763.
- 18 M. Li, X. Zhang and P. Yang, *Nanoscale*, 2021, **13**, 3860–3867.
- 19 M. Kim, J. H. Kim, M. Kim, C. S. Kim, J. W. Choi, K. Choi, J. H. Lee, J. Park, Y.-C. Kang, S.-H. Jin and M. Song, *J. Ind. Eng. Chem.*, 2020, **88**, 84–89.
- 20 T. Gu, J. Zhong, M. Ge, R. Shi, L. He and P. Bai, *J. Colloid Interface Sci.*, 2024, **657**, 580–589.
- 21 J. Park, K. Y. Jang, S. H. Lee, D.-H. Kim, S.-H. Cho and T.-W. Lee, *Chem. Mater.*, 2023, **35**, 6266–6273.
- 22 X. Feng, X. Zhang, J. Huang, R. Wu, Y. Leng and Z. Chen, *Anal. Chem.*, 2022, **94**, 5946–5952.
- 23 T. Yang, Y. Zhu, X. Yang and J. Shen, *Adv. Mater. Interfaces*, 2022, **9**, 2200571.
- 24 M. N. An, S. Park, R. Brescia, M. Lutfullin, L. Sinatra, O. M. Bakr, L. De Trizio and L. Manna, *ACS Energy Lett.*, 2021, **6**, 900–907.
- 25 X. Li, W. Cai, H. Guan, S. Zhao, S. Cao, C. Chen, M. Liu and Z. Zang, *Chem. Eng. J.*, 2021, **419**, 129551.
- 26 J. An, M. Chen, G. Liu, Y. Hu, R. Chen, Y. Lyu, S. Sharma and Y. Liu, *Anal. Bioanal. Chem.*, 2021, **413**, 1739–1747.
- 27 Q. Zhang, B. Wang, W. Zheng, L. Kong, Q. Wan, C. Zhang, Z. Li, X. Cao, M. Liu and L. Li, *Nat. Commun.*, 2020, **11**, 31.
- 28 P. Chen, Y. Liu, Z. Zhang, Y. Sun, J. Hou, G. Zhao, J. Zou, Y. Fang, J. Xu and N. Dai, *Nanoscale*, 2019, **11**, 16499–16507.
- 29 S. Li, D. Lei, W. Ren, X. Guo, S. Wu, Y. Zhu, A. L. Rogach, M. Chhowalla and A. K.-Y. Jen, *Nat. Commun.*, 2020, **11**, 1192.

- 30 N. Ding, D. Zhou, X. Sun, W. Xu, H. Xu, G. Pan, D. Li, S. Zhang, B. Dong and H. Song, *Nanotechnology*, 2018, **29**, 345703.
- 31 D. N. Dirin, L. Protesescu, D. Trummer, I. V. Kochetygov, S. Yakunin, F. Krumeich, N. P. Stadie and M. V. Kovalenko, *Nano Lett.*, 2016, **16**, 5866–5874.
- 32 H. Wang, S. Lin, A. Tang, B. P. Singh, H. Tong, C. Chen, Y. Lee, T. Tsai and R. Liu, *Angew. Chemie Int. Ed.*, 2016, **55**, 7924–7929.
- 33 W. L. Huang, W. H. Liao and S. Y. Chu, *ACS Appl. Mater. Interfaces*, 2023, **15**, 41151–41161.
- 34 Z. Pan, X. Zhu, T. Xu, Q. Xie, H. Chen, F. Xu, H. Lin, J. Wang and Y. Liu, *Appl. Sci.*, 2023, **13**, 7529.
- 35 Z. Zheng, L. Liu, F. Yi and J. Zhao, *J. Lumin.*, 2019, **216**, 116722.
- 36 W.-L. Huang and S.-Y. Chu, *Ceram. Int.*, 2023, **49**, 15802–15810.
- 37 V. Malgras, S. Tominaka, J. W. Ryan, J. Henzie, T. Takei, K. Ohara and Y. Yamauchi, *J. Am. Chem. Soc.*, 2016, **138**, 13874–13881.
- 38 L.-C. Chen, L.-W. Chao, C.-Y. Xu, C.-H. Hsu, Y.-T. Lee, Z.-M. Xu, C.-C. Lin and Z.-L. Tseng, *Biosensors*, 2021, **11**, 440.
